# 1 Geodesics to Characterize the Phylogenetic Landscape

2 Marzieh Khodaei<sup>1,\*</sup>, Megan Owen<sup>2</sup>, and Peter Beerli<sup>1</sup>

3 <sup>1</sup> Department of Scientific Computing, Florida State University, Tallahassee, FL 32306, USA

4 <sup>2</sup> Department of Mathematics, Lehman College and Graduate Center, CUNY, NY 10468, USA

5 \*Corresponding author: Marzieh Khodaei, email: mk16e@fsu.edu

## 6 Abstract

7 Phylogenetic trees are fundamental for understanding evolutionary history. However, finding maximum like-  
8 lihood trees is challenging due to the complexity of the likelihood landscape and the size of tree space. Based  
9 on the Billera-Holmes-Vogtmann (BHV) distance between trees, we describe a method to generate interme-  
10 diate trees on the shortest path between two trees, called pathtrees. These pathtrees give a structured way to  
11 generate and visualize treespace in an area of interest. They allow investigating intermediate regions between  
12 trees of interest, exploring locally optimal trees in topological clusters of treespace, and potentially finding  
13 trees of high likelihood unexplored by tree search algorithms. We compared our approach against other tree  
14 search tools (PAUP\*, RAXML, and REVBAYES) in terms of generated highest likelihood trees, new topology  
15 proportions, and consistency of generated treespace. We assess our method using two datasets. The first  
16 consists of 23 primate species (CytB, 1141 bp), leading to well-resolved relationships. The second is a dataset  
17 of 182 milksnakes (CytB, 1117 bp), containing many similar sequences and complex relationships among  
18 individuals. Our method visualizes the treespace using log likelihood as a fitness function. It finds similarly  
19 optimal trees as heuristic methods and presents the likelihood landscape at different scales. It revealed that  
20 we could find trees that were not found with MCMC methods. The validation measures indicated that our  
21 method performed well mapping treespace into lower dimensions. Our method complements heuristic search  
22 analyses, and the visualization allows the inspection of likelihood terraces and exploration of treespace areas  
23 not visited by heuristic searches.

24 **Key words:** Phylogenetic treespace; Billera-Holmes-Vogtmann treespace; likelihood; convex hull; pathtrees;  
25 optimal tree; multidimensional scaling; interpolation

## 26 Introduction

27 Evolutionary trees, or phylogenetic trees, have been used extensively throughout systematic biology and other  
28 fields to represent the evolutionary history of species. How to compute the best tree and how to characterize  
29 the uncertainty of estimates of the branch lengths and the topology is an on-going challenge. Generally  
30 tree search methods seek a globally best tree under some optimization criteria (e.g. parsimony (Fitch 1971),  
31 distance methods (Fitch and Margoliash 1967; Saitou and Nei 1987), or maximum likelihood (Felsenstein  
32 1981)), but the number of potential trees grows exponentially relative to the number of leaves (Schröder  
33 1870). Furthermore, it is NP-hard to compute the maximum likelihood tree (Roch 2006; Chor and Tuller  
34 2005) or most parsimonious tree (Foulds and Graham 1982), so except for small numbers of taxa where  
35 exhaustive search is possible, heuristic methods must often be used to search the treespace. These methods  
36 explore locally best trees in the hope that the best local tree found is equivalent to the global best tree (e.g.  
37 maximum likelihood programs RAXML (Stamatakis et al. 2005), PHYML (Guindon and Gascuel 2003), and  
38 PAUP\* (Swofford 2003)). Similarly, Bayesian inference programs use tree rearrangement moves to generate  
39 proposals to estimate the posterior probability (e.g. Bayesian inference programs MRBAYES (Huelsenbeck  
40 and Ronquist 2001), REVBAYES (Höhna et al. 2016), and BEAST (Drummond and Rambaut 2007)).

41 Initially, many optimality criteria to compare trees were developed, the most prominent being parsimony  
42 (Fitch 1971), distance methods (Fitch and Margoliash 1967; Saitou and Nei 1987), and maximum likeli-  
43 hood (Felsenstein 1981). Computational power has increased considerably since then, so computationally  
44 intense probabilistic methods such as maximum likelihood and Bayesian inference have supplanted faster  
45 but less accurate methods. Researchers now commonly use maximum likelihood programs, such as RAXML  
46 (Stamatakis et al. 2005), PHYML (Guindon and Gascuel 2003), and PAUP\* (Swofford 2003), or Bayesian  
47 inference programs, such as MRBAYES (Huelsenbeck and Ronquist 2001), REVBAYES (Höhna et al. 2016),  
48 and BEAST (Drummond and Rambaut 2007).

49 Both Bayesian inference and maximum likelihood methods use random changes in the tree topology to  
50 search the treespace. Even when we record all visited trees in a maximum likelihood search or look at all  
51 collected trees in a Bayesian Markov chain Monte Carlo run, we can see a "gappy" space, where trees on the  
52 space were not evenly spaced: some regions are more concentrated and other regions are sampled sparsely  
53 or not at all. For example, an MCMC may not explore the space or posterior distribution efficiently due to  
54 revisiting trees topologies (Lakner et al. 2008) or due to low posterior nodes separating peaks (Whidden and  
55 Masten 2015). While in an ML tree search, Money and Whelan (2012) show that different rearrangement  
56 moves correspond to discretized treespaces with different numbers of local optima.

57 While the concept of treespace is often used informally to mean the set of all possible phylogenetic

58 trees meeting some condition, such as having  $n$  leaves, a treespace can be formally defined as a discrete  
59 or continuous metric space (ie. a geometric space with a distance measure between points meeting certain  
60 conditions) where each point corresponds to a tree (see [St. John \(2017\)](#) for a comprehensive review of  
61 treespaces). In this paper, we use the Billera-Holmes-Vogtmann (BHV) treespace ([Billera et al. 2001](#)), which  
62 is a continuous, piece-wise Euclidean space containing all trees with branch lengths and  $n$  leaves. This space  
63 contains unique shortest paths, or geodesics, between any two points, with the lengths of these paths being  
64 the Billera-Holmes-Vogtmann (BHV) distance. Both the BHV distance and geodesics between trees can  
65 be computed in polynomial time ([Owen and Provan 2011](#)). The weighted Robinson-Foulds distance (wRF)  
66 ([Robinson and Foulds 1979](#)) corresponds to using an  $L_1$  metric instead of an  $L_2$  metric on the piecewise-  
67 Euclidean orthants of BHV treespace. The wRF distance does not have unique geodesics but is faster to  
68 compute than the BHV distance and is at most a multiplicative factor of  $\sqrt{2}$  larger than the BHV distance  
69 ([Amenta et al. 2007](#)). The Robinson-Foulds (RF) distance ([Robinson and Foulds 1981](#)) is the same as the  
70 weighted Robinson-Foulds distance when all edge lengths are set to be 1.

71 A landscape is a configuration space or a metric space of trees (with or without branch lengths)  $\mathcal{T}$  and  
72 an associated real-valued cost or fitness function  $f : \mathcal{T} \rightarrow \mathbb{R}$ . Landscapes were first defined by [Bastert et al.](#)  
73 [\(2002\)](#) on trees without branch lengths, so the metric space  $\mathcal{T}$  was a graph. A landscape on trees without  
74 branch lengths can be visualized as a colored graph, where the trees are the nodes, colored by the fitness  
75 function value, and edges represent a minimal rearrangement move between trees, such as Subtree-Prune and  
76 Regraft (SPR) ([Whidden and Masten 2015](#)). Alternatively, for trees with or without branch lengths, distances  
77 can be computed between the trees, and visualized in 2 or 3 dimensions using Multi-Dimensional Scaling  
78 (MDS). MDS approximates the pairwise distances between points by mapping them in a lower-dimensional  
79 Euclidean space ([Kruskal 1964](#)), and was first applied to sets of phylogenetic trees by [Amenta and Klingner](#)  
80 [\(2002\)](#) and popularized by [Hillis et al. \(2005\)](#). Most often, the trees in an MDS visualization have been  
81 colored to indicate some kind of clustering (e.g. [Hillis et al. \(2005\)](#); [Kendall and Colijn \(2016\)](#); [Gori et al.](#)  
82 [\(2016\)](#); [Jombart et al. \(2017\)](#)), but they can also be colored by the fitness function to visualize landscapes.  
83 For example, [Hillis et al. \(2005\)](#) included a Bayesian MCMC trace with RF distances colored by likelihood;  
84 [Höhna and Drummond \(2012\)](#) used the Nearest-Neighbor Interchange (NNI) distance colored by posterior  
85 probability with trees separated by a single NNI move joined by an edge; and [Wright and Lloyd \(2020\)](#)  
86 using RF distance colored by the minimum implied gap (MIG) score, a measure of congruence with the fossil  
87 record, and included an MDS visualization with interpolation of the MIG score across the MDS space.

88 We use MDS to visualize landscapes where the fitness function is the log likelihood, but approach the  
89 visualization in a different way from previous work. For a given area of interest in treespace, we sample trees  
90 along geodesics crossing this area to get a representative set of trees ("pathtrees"). We then use MDS to map

91 these pathtrees into 2 dimensions, color them by their log likelihood, and use interpolation to estimate the  
92 likelihood landscape in the treespace area of interest. We also show the landscape function as a 3-D surface  
93 over the 2-D MDS plot and call this a likelihood surface. Thus, our visualizations try to illustrate the overall  
94 landscape tendency in the part of treespace of interest, instead of only point values of the fitness function,  
95 possibly unevenly distributed.

96 There are several recent packages or programs for visualizing trees using MDS, but they focus on coloring  
97 the points by cluster rather than a fitness function. TREESCAPER (Huang et al. 2016) is a standalone GUI that  
98 allows different tree distance functions, cost functions for dimensionality reduction, and non-linear dimension  
99 reduction algorithms to be used. TREESPACE (Jombart et al. 2017) is an R package that allows a wide  
100 variety of tree metrics and methods for clustering trees to be used. Smith (2022) evaluated the performance  
101 of multiple aspects of low-dimensional representations of sets of trees, and provides an R package TreeDist  
102 for users to do the same. Finally, R We There Yet (RWTY) (Warren et al. 2017), a package for analyzing  
103 Bayesian analyses convergence, can produce nonlinear MDS visualization of landscapes using the RF or path  
104 difference distance (Steel and Penny 1993) and colored by the likelihood. Some authors (Amenta et al.  
105 2015; Wilgenbusch et al. 2017; Smith 2022) have analyzed how well MDS visualizes treespace, and suggested  
106 validation measures. There are other ways to visualize sets of related trees beyond dimensionality reduction,  
107 such as super-imposing the trees on each other, as in DensiTree (Bouckaert 2010), or sophisticated tree  
108 comparison visualizers, like ADView (Liu et al. 2019).

109 We will focus on likelihood as the optimality criterion for the rest of this paper. While there is a closed-  
110 form expression to compute the likelihood of a given tree, given sequence data, the likelihood function itself is  
111 very complex with multiple local optima (Steel 1994; Chor et al. 2000). Finding the best tree in the presence  
112 of multiple local and global optima and the presence of regions of trees with similar, high likelihood, such as  
113 islands (Maddison 1991; Salter 2001) and terraces (Sanderson et al. 2011; 2015) is difficult. Our method can  
114 deliver additional support for other heuristic methods by investigating the relationship among trees in the  
115 BHV space and visualizing the landscape at different scales in an area of interest in treespace using MDS.  
116 We apply our method to two datasets, and discover novel high likelihood tree topologies. We distribute our  
117 approach in the Python package PATHTREES.

## 118 1 Materials and Methods

119 We developed a method to generate and visualize the log-likelihood landscape in an area of interest in a  
120 treespace, and potentially find trees of high likelihood unexplored by tree search algorithms. We sample trees  
121 ("pathtrees") along the shortest paths in BHV treespace between points on a convex hull enclosing the area

122 of interest, and also compute the optimized branch lengths for each tree topology found. We then use MDS  
123 to map all of these trees into two dimensions and use splines to interpolate the log-likelihood in the spaces  
124 between trees to visualize the relationship of the trees and their landscape. For the rest of this paper, we use  
125 "treespace" to refer to the Billera-Holmes-Vogtmann (BHV) treespace, unless otherwise specified.

## 126 1.1 Billera-Holmes-Vogtmann (BHV) treespace and shortest paths

127 The Billera-Holmes-Vogtmann (BHV) treespace models all phylogenetic trees with a fixed set of leaves. It  
128 is formed from a set of Euclidean regions, called orthants. Each orthant contains only trees with the same  
129 topology. Each tree topology consists of a unique set of splits (Buneman 1971), and each of these splits is  
130 assigned to one of the dimensions of the orthant. Each branch length in a tree becomes the coordinate in  
131 the orthant along the dimension corresponding to the branch's split. Two orthants with corresponding tree  
132 topologies that share splits are adjacent in the treespace, and their shared boundary orthant contains all  
133 trees containing exactly the shared splits. All orthants contain the origin, which corresponds to the star tree,  
134 so the space is connected.

135 The length of a path between two trees is computed by measuring the Euclidean length of the path in  
136 each orthant it passes through, and summing those lengths. There is a unique shortest path, or geodesic,  
137 connecting two phylogenetic trees  $T_1$  and  $T_2$  in BHV treespace (Billera et al. 2001), and it can be computed  
138 in polynomial time  $O(n^4)$ , where  $n$  is the number of leaves in the trees, by the Geodesic Treepath Problem  
139 (GTP) algorithm (Owen and Provan 2011).

140 If trees  $T_1$  and  $T_2$  have no common splits, then the GTP algorithm starts with a simple initial path,  
141 called the cone path, which connects trees  $T_1$  and  $T_2$  to the origin (a star tree), and hence each other, by  
142 straight lines. Then, the cone path is transformed into a series of successively shorter paths until the geodesic  
143 is obtained. At each step, the algorithm identifies one new orthant that the current path can be modified  
144 to pass through to yield a shorter path. When trees  $T_1$  and  $T_2$  have splits in common, the algorithm first  
145 subdivides  $T_1$  and  $T_2$  along the common splits, and runs the GTP algorithm described above on each pair of  
146 subtrees. The shortest paths between the subtrees are then combined into the overall geodesic between  $T_1$   
147 and  $T_2$ . Fig. 1 demonstrates an example of a geodesic between two trees, and the geometric representation of  
148 treespace. The top row shows a starting tree ( $T_1$ ), an ending tree ( $T_2$ ), and the two trees where the geodesic  
149 between  $T_1$  and  $T_2$  crosses orthant boundaries. The bottom row shows the geodesic, the cone path, parts of  
150 the three orthants that the geodesic passes through, and an example tree of each orthant. Moving along the  
151 geodesic from start tree  $T_1$  to end tree  $T_2$ , the intermediate tree branches shrink to zero length at orthant  
152 boundaries, and new branches begin to grow.

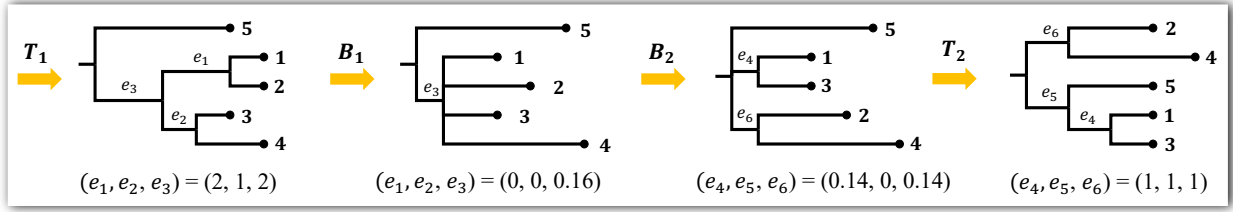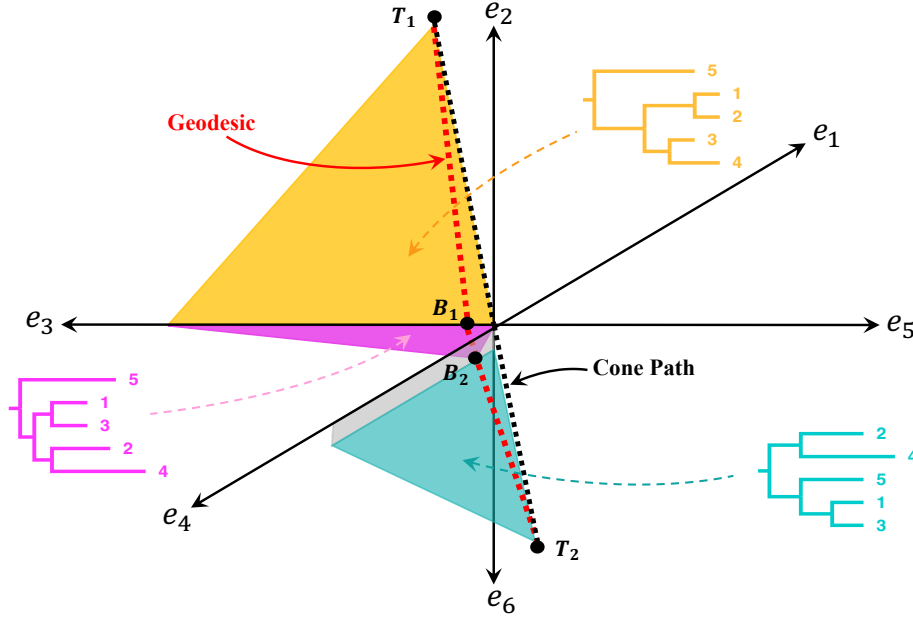

Figure 1. Shortest path (geodesic) between two trees in the BHV treespace. First row: a start tree  $T_1$  and an end tree  $T_2$  with two intermediate trees  $B_1$  and  $B_2$  on the boundaries of orthants, axis  $e_3$  and the quarter-plane formed by axes  $e_4$  and  $e_6$ , respectively. Bottom row: Black dots mark the trees in the top row; the cone path is the black dotted line; the geodesic is the red dotted line; each colored region is part of a different orthant containing the geodesic; and an example tree with arbitrary branch lengths is shown for each orthant.

## 1.2 Sampling trees on the shortest path between tree pairs

Our method samples trees along the shortest paths (geodesics) between points on the boundary of our area of interest. The topologies and edge lengths for these sampled trees on the geodesic between trees  $T_1$  and  $T_2$  are given by Theorem 2.4 of Owen and Provan (2011) and Theorem 1.2 of Miller et al. (2015). First let  $(A_1, A_2, \dots, A_k)$  be a partition of the splits in  $T_1$  that are not in  $T_2$ , where  $A_i$  is the set of splits whose branches shrink to zero length at the  $i$ -th orthant boundary along the geodesic. Let  $(B_1, B_2, \dots, B_k)$  be a partition of the splits of  $T_2$  that are not in  $T_1$ , where  $B_i$  is the set of splits whose branches begin growing from zero length at the  $i$ -th orthant boundary. Let  $C$  be the set of splits common to  $T_1$  and  $T_2$ , and parameterize the geodesic between  $T_1$  and  $T_2$  by  $0 \leq \lambda \leq 1$ . For split  $e$  in tree  $T$ , denote its branch length in  $T$  by  $|e|_T$  and for the set of splits  $S$  in tree  $T$ , let  $\|S\| = \sqrt{\sum_{e \in S} |e|_T^2}$ . Then by Theorem 2.4 of Owen and Provan (2011) and Theorem 1.2 of Miller et al. (2015), a tree  $T_i$  on this geodesic at position  $\lambda$  in the  $i$ -th orthant contains exactly the splits

$$\mathcal{S} = C \cup B_1 \cup \dots \cup B_i \cup A_{i+1} \cup \dots \cup A_k, \quad (1)$$

165 such that split  $e \in \mathcal{S}$  has branch length

$$|e|_{T_i} = \begin{cases} \frac{(1-\lambda)\|A_j\| - \lambda\|B_j\|}{\|A_j\|} |e|_{T_1} & e \in A_j \\ \frac{\lambda\|B_j\| - (1-\lambda)\|A_j\|}{\|B_j\|} |e|_{T_2} & e \in B_j \\ (1-\lambda)|e|_{T_1} + \lambda|e|_{T_2} & e \in C \end{cases} \quad (2)$$

166 Thus, the trees along the geodesic between  $T_1$  and  $T_2$  can only contain splits from  $T_1$  and  $T_2$ , and any split  
 167 common to  $T_1$  and  $T_2$  appears in all trees along the geodesic between them. Additionally, as shown in [Fig. 1](#)  
 168 where the geodesic passes through the quarter plane formed by the axes  $e_3$  and  $e_4$ , a geodesic can non-trivially  
 169 pass through lower-dimensional orthants, corresponding to trees with 0 length edges. Each tree  $T_i$  generated  
 170 along the path is then stored in the standard Newick format. Some trees on the geodesic are not bifurcating  
 171 trees.

### 172 1.3 Finding the starting trees for PATHTREES

173 Our method visualizes the landscape in an area of interest in treespace. The boundary of this area is defined  
 174 by a set of trees. We compute the shortest path between each pair in this set of trees, and sample trees  
 175 along these paths to get the pathtrees. Our package can generate random starting trees, but with a larger  
 176 number of taxa, these random trees span a very large section of treespace. Instead of random starting trees,  
 177 we use a large set of trees generated by another method, for example, by REVBayes using Markov chain  
 178 Monte Carlo. We calculate the BHV distance between these trees and map them to two dimensions using  
 179 MDS. The trees that are on the vertices of the convex hull, the smallest convex polygon enclosing all of the  
 180 trees in the 2-D MDS plane, are then extracted and used as the starting trees for PATHTREES. For example,  
 181 we collected 50,000 trees using the program REVBayes and the primate dataset (outlined in more detail in  
 182 [Section 1.7](#)) and then extracted 1000 trees from the last 1/10 of the MCMC chain. [Fig. 2](#) shows the space of  
 183 1000 trees and the trees on the vertices of the corresponding convex hull. The PATHTREES will only depend  
 184 on the trees on the convex hull. Ideally, we would want to calculate the hull in treespace and not the 2-D  
 185 MDS space but currently, there is an algorithm to achieve that.

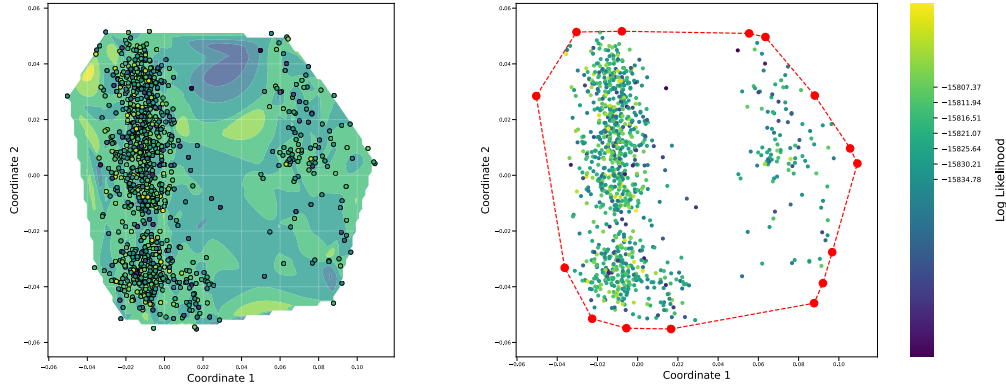

Figure 2. An example of sample treespace and its convex hull. Left: A log-likelihood contour plot of the first two multidimensional scaling (MDS) coordinates of the sampled trees. The log-likelihood contour is a cubic spline interpolation of the log likelihoods of all trees in the MDS plane; the MDS coordinates are computed from the BHV distances between trees. Each dot is a tree; the lighter the dot, the higher the likelihood of the tree. Right: the convex hull of the set of trees. The red dots are the vertices of the convex hull, displaying the sample trees on the boundary of the treespace.

#### 1.4 Visualizing treespace and generating pathtrees

The largest orthants in the BHV treespace for  $n$ -leaf rooted trees have dimension  $2n - 3$ , so landscapes on this treespace cannot be visualized directly. Instead, we follow precedent (Amenta and Klingner 2002) and we generate a distance matrix for all  $N$  trees we wish to visualize, and use this distance matrix as input into a multidimensional scaling (MDS) algorithm (Cox and Cox 2008) to compress the higher dimensional treespace into two dimensions. The BHV tree space is high dimensional and compressing this space using MDS to 2 dimension may bring unrelated trees close to each other. We evaluated this mapping by comparing the 2-D MDS coordinate distance matrix with the tree distance matrix using correlation measures, such as Pearson’s  $r$ . Since we are interested not only in the relationship among the trees but also in how well they fit the data, we calculate the log-likelihood for each tree and add this dimension to the 2-D MDS visualization either as contours or a third coordinate axis. For a smooth representation of the likelihood surface, we interpolate the log-likelihood values between the  $N$  trees using an interpolation method. We used two different methods: the cubic spline interpolation method (De Boor 1978) and the radial basis function (RBF) thin-plate spline interpolation (Buhmann 2003). The differences between the two interpolation methods (cubic spline interpolation and the thin-plate spline interpolation) are discussed in Supplementary Section S3.

The MDS procedure is time-consuming for large distance-matrices. We experimented with two different distance metrics for visualization: the BHV distance and the weighted Robinson-Foulds (wRF) distance (Robinson and Foulds 1979). The wRF distance is faster to compute than the BHV distance and is, at most, a multiplicative factor of  $\sqrt{2}$  larger than the BHV distance.



206 The distribution of the sampled trees shown in Fig. 2 highlights that some areas of treespace were sampled  
 207 less well than others. In contrast, choosing trees along geodesics allow us to visualize trees that are evenly  
 208 spaced between two arbitrary end-point trees. We demonstrate these pathtrees in Fig. 3 where we selected  
 209 three trees (colored triangles) from the 1000 sample trees visualized in Fig. 2 and generated 20 trees on  
 210 the shortest path in the BHV treespace between each pair of them and then visualized the contour and the  
 211 surface of all 1060 trees in 2-D MDS space. The selected three trees are provided in Supplementary Fig. S1.  
 212 The pathtrees bridge the gaps between the sampled trees.

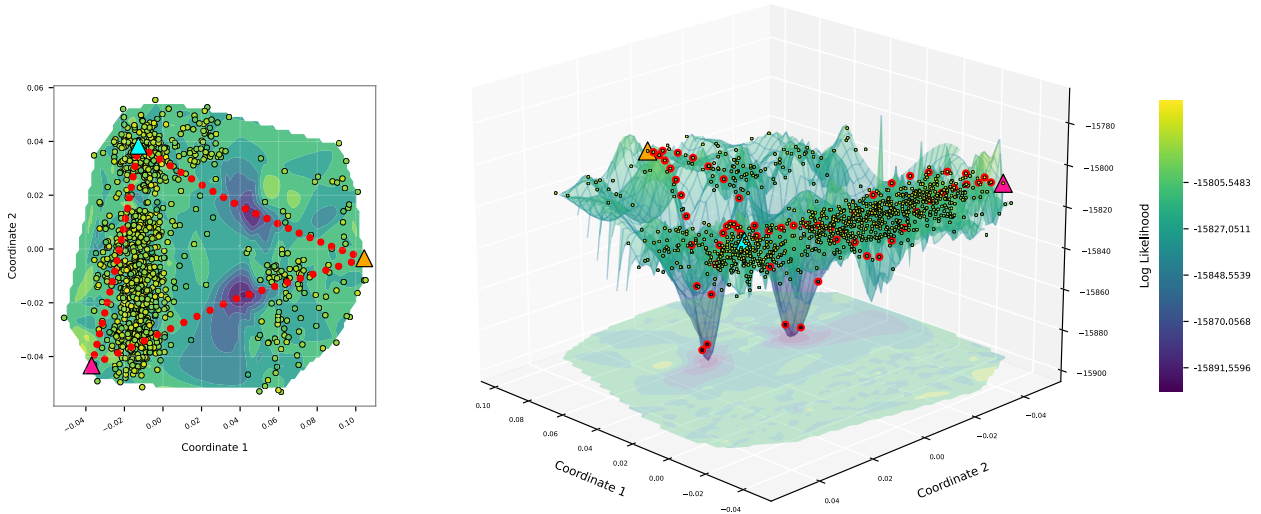

Figure 3. An example of pathtrees between three arbitrary trees in the treespace. Cubic spline interpolation of the log likelihood was used for the contour color (left) and the surface height (right) of the space inside the convex hull. 20 pathtrees (red dots) were generated on the shortest path between each pair of 3 trees (triangles).

### 213 1.5 Optimizing the branch-length of pathtrees

214 The pathtrees lay on the shortest path between a start and end tree (anchor trees). This path is con-  
 215 structed by refinement of the cone path as discussed in Section 1.1, so the resulting pathtrees will more  
 216 commonly have short branches. To find the best tree and also find potential local likelihood maxima, we  
 217 need to find pathtrees with the same topology and then optimize the branch lengths for that topology. We  
 218 apply the unweighted Robinson-Foulds distance (Robinson and Foulds 1981) to detect the different topolo-  
 219 gies; then we use PAUP\* to optimize the branch lengths of a tree in each topology cluster. Fig. 4 shows the  
 220 locations of the pathtrees and their corresponding optimized trees. If the anchor trees have different topolo-  
 221 gies, they are located in different orthants. The pathtrees can have different intermediate topologies that,  
 222 when optimized, will be located away from the shortest path. Unoptimized trees that start in low likelihood  
 223 areas of treespace may move particularly far away, whereas trees that start on a ridge may not move far.

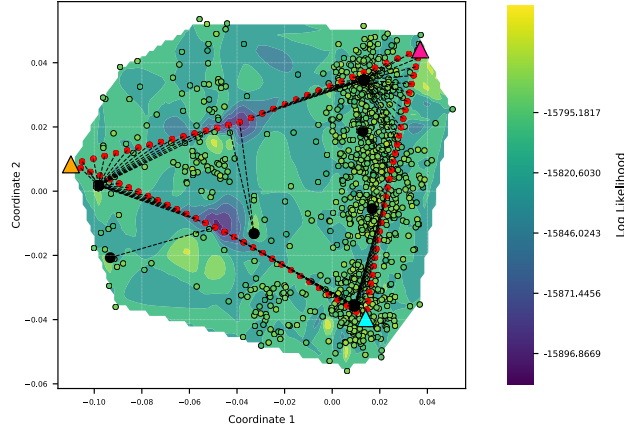

Figure 4. An example of pathtrees and their corresponding optimized trees. Each pathtree is connected to its corresponding optimized tree (black circles).

## 224 1.6 Software implementation

225 Our method is implemented in the Python package PATHTREES. The method uses the Java package GTP  
 226 (Owen and Provan 2011) to generate the geodesic between pairs of trees, the program PAUP\* (Swofford 2003)  
 227 for likelihood optimization, the Python modules DendroPy (Sukumaran and Holder 2010) for the Robinson-  
 228 Foulds metric, and several other standard Python modules, such as SCIPY and NUMPY (Virtanen et al. 2020;  
 229 Harris et al. 2020).

230 We summarize the tree searching strategy of our package PATHTREES in the algorithm:

231 **Input:** Sequence data in PHYLIP format and  $N$  rooted, non-ultrametric trees in plain Newick format  
 232 sampled in connection with the sequence data (e.g. from a MCMC Bayesian analysis chain of the sequence  
 233 data).

234 **Output:** Trees on the shortest paths through treespace between all pairs of starting trees; optimized branch  
 235 lengths for each different pathtree topology; MDS visualization of treespace and likelihood landscape inside  
 236 the convex hull of input trees.

237 **Algorithm:**

- 238 1. Compute all pairwise distances between  $N$  sample trees, and compute their MDS coordinates.
- 239 2. Extract the trees on the vertices of the convex hull of the  $N$  sample trees in the 2-D MDS plane and  
 240 consider them as starting trees.
- 241 3. Generate  $m$  equally spaced trees on the geodesic between each pair of starting trees. Put all starting  
 242 trees and generated pathtrees in the set current sample trees.
- 243 4. Calculate the likelihood of all current sample trees.

- 244 5. Select  $n$  trees with the highest likelihood among current sample trees and classify them with respect to  
245 their topologies. Let there be  $t$  topologies among them.
- 246 6. For each topology cluster, optimize the branch lengths for that topology and add these  $t$  optimized  
247 trees to the current sample trees.
- 248 7. Visualize the contour and surface of the current sample trees by creating a distance matrix using either  
249 the weighted Robinson-Foulds or the BHV distance metric, interpolating log-likelihood values, and  
250 recomputing the MDS coordinates.
- 251 8. Return the current sample trees, the pathtrees, and the visualization; or continue with step 3 to zoom  
252 in the area of optimized trees of the current iteration.

## 253 1.7 Application to real data

254 We evaluate our approach PATHTREES using two datasets that were previously published:  $D_1$  is a dataset  
255 of primates used in the tutorial for the program REVBAYES (Höhna et al. 2017). The dataset consists of  
256 1141 base pairs of the mitochondrial cytochrome b gene of 23 primate taxa.  $D_2$  is a larger mitochondrial  
257 cytochrome b dataset of 182 milksnakes (1117 bp) (Ruane et al. 2014; Chambers and Hillis 2019). We chose  
258 the two different datasets because they represent very different situations.  $D_1$  is a relatively small dataset  
259 but still too large to consider an exhaustive tree search. The species in the dataset are well defined, and the  
260 dataset contains enough variability to establish a phylogeny with branch lengths that are neither zero nor  
261 huge. In contrast,  $D_2$  has about eight times more individuals than  $D_1$ ; these individuals are only from a few  
262 species or subspecies, and many individuals share the same DNA sequence with others in the dataset. We  
263 deliberately did not attempt to consolidate the dataset into unique site patterns, anticipating that the many  
264 zero branch lengths would be a stress test for our method.

265 For the first dataset  $D_1$ , we collected 50,000 trees using the program REVBAYES. We used the instructions  
266 from the tutorial of REVBAYES (Höhna et al. 2017), which are shown in [Supplementary Section S5](#). We  
267 selected every 38th tree from the last 3/4 of the total 50,000 sample trees (around 1000 sample trees) and  
268 then extracted the trees on the vertices of the convex hull of these sample trees (14 trees) as starting trees  
269 for PATHTREES. These trees were the starting trees for two experiments: (1) 1 pathtree between each pair  
270 of starting trees and (2) a higher number of 15 pathtrees between each pair of starting trees to show a more  
271 detailed treespace. We used the BHV distance between trees for MDS for the first experiment and the faster  
272 wRF distance for the second experiment to make the computations tractable.

273 For the second dataset  $D_2$ , we collected 10,000 trees using the program REVBAYES. After removing the  
274 first 300 trees as burn-in, we selected every 20 trees and extracted 500 trees to be considered in convex hull

275 analysis. The 14 trees on the vertices of the convex hull were used as starting trees in PATHTREES. For the  
276 second dataset, considering that it is a complicated dataset with 182 individuals, we intentionally collected a  
277 smaller sample of 10000 trees from REVBAYES, compared to the first dataset, and burned in a small portion  
278 of trees just to verify that it is not required to generate a very long chain of REVBAYES trees and large  
279 burn-in to get a reasonable treespace to generate starting trees for PATHTREES. We computed 4 pathtrees  
280 along the shortest path between each starting tree pair and selected the 100 trees with the highest likelihood  
281 to classify by topology for branch length optimization. We then performed a second iteration of our method  
282 ("zoomed in") by computing the convex hull of the 100 optimized trees of the first iteration. The vertices  
283 of this convex hull became the starting trees for our second iteration, and in this iteration we computed 5  
284 pathtrees along each shortest path between starting tree pairs. For both iterations, we used the wRF distance  
285 between trees as input for MDS, and used thin-plate spline interpolation to visualize the likelihood landscape.

## 286 1.8 Comparison of PATHTREES with heuristic tree searches

287 We compared the highest likelihood trees found by PATHTREES with those generated by the maximum  
288 likelihood software PAUP\* 4.0a (build 168) (Swofford 2003), RAXML 8.2.12 (Stamatakis et al. 2005), and  
289 the Bayesian inference software REVBAYES 1.1.1 (Höhna et al. 2016). These programs perform heuristic  
290 searches. PAUP\* and RAXML search will swap on new tree topologies until a local maximum has been  
291 reached and no new tree topologies need further evaluations. These heuristics do not guarantee to recover  
292 the global maximum likelihood tree but usually deliver good results (Stamatakis et al. 2005). In contrast,  
293 REVBAYES uses Markov chain Monte Carlo to evaluate the posterior probability of a tree while collecting  
294 trees along a Markov chain. The run time is user-determined and needs to be long enough to sample good  
295 candidate trees. These trees are then used to estimate the maximum a posteriori tree.

296 We conducted several experiments to evaluate whether the number of intermediate pathtrees for each pair  
297 of anchor trees affects the accuracy of the MDS reconstruction of the likelihood surface and how well we can  
298 recover the best tree. We use the Jukes-Cantor mutation model for the likelihood calculation throughout all  
299 analyses. Using such a simple model reduces potential difficulties introduced by parameter fitting.

300 We compared PATHTREES with PAUP\* and REVBAYES for dataset  $D_1$  because we were confident that  
301 the REVBAYES analysis converged. For dataset  $D_2$ , we compared PATHTREES with PAUP\* and RAXML  
302 because even long runs of REVBAYES did not deliver stable results. Both PAUP\* and RAXML were run  
303 without improving parameters that tune the heuristic search. All generated pathtrees were compared with  
304 all the evaluated trees in REVBAYES to investigate whether our approach can find topologies that were not  
305 visited by REVBAYES.

## 2 Results

We use our methods for landscape generation and visualization and finding high likelihood trees to examine the two datasets  $D_1$  and  $D_2$  using our method. Fig. 5 shows the contour and surface plots of the visualized treespace landscape for dataset  $D_1$ , generated with one pathtree per pair of starting trees (14 starting trees and 91 total pathtrees), and using the BHV distance for MDS input and thin-plate spline interpolation of the log-likelihood values of all plotted trees. The first row of Fig. 5 shows the 15 trees with the highest likelihood (small pink/purple colored disks) selected from the 91 pathtrees +14 starting trees. These 15 trees contained 4 different topologies, and the branch lengths in each topology cluster were optimized (medium-size circles). The purple spectrum color bar shows the relationship between the likelihood values of the optimized trees for each topology; the lighter the color of the topology (medium-sized dots), the lower the likelihood value of the corresponding optimized tree in that topology. Among locally optimal trees associated with different topologies, we found the best tree with the log likelihood of  $-15795.1817$  (red square). We find the same tree as PAUP\* (big white circle) as the optimal tree and also find the same tree as the maximum a posteriori tree (MAP) in REVBAYES (big black circle) as a locally optimal tree. In the plots, we see higher likelihood areas near the outside of the convex hull and a lower likelihood region in the middle. The 15 highest likelihood trees selected for topology analysis and their optimized topology trees are also towards the edges of the convex hull.

The second row in Fig. 5 shows the same 91 pathtrees and 14 starting trees as the first row, but optimized branch lengths have been computed for all their different topologies (30 topologies in total). Among all locally optimized trees (30 local optima corresponding to different topologies), we found again the best tree with the log likelihood of  $-15795.1817$ . In the plots, we still see a lower likelihood region in the middle of the convex hull, along with some points of higher likelihood corresponding to optimized trees. The orientation of the landscape is flipped from the first row, but this is an artifact of MDS.

Fig. 6 shows the contour and surface plots of the visualized treespace landscape for dataset  $D_1$ , generated with 15 pathtrees per starting tree pair, and using the wRF distance for MDS input and thin-plate spline interpolation of the log-likelihood values of all plotted trees. We generated a total of 1365 pathtrees with 43 different topologies to show a detailed treespace with a high number of trees. After optimizing the branch lengths for all 43 topologies, PATHTREES found the same best tree as PAUP\*, as previously found, with the log likelihood of  $-15795.1817$ . With a higher number of pathtrees, we have a surface where trees are evenly spread out, and the gaps are filled. The best trees detected by PATHTREES, PAUP\*, and REVBAYES were added to Supplementary Fig. S2. We still see a lower likelihood region in the middle of the plots. Pathtrees with the same topology are generally grouped together, and the sampling is dense enough that we can see

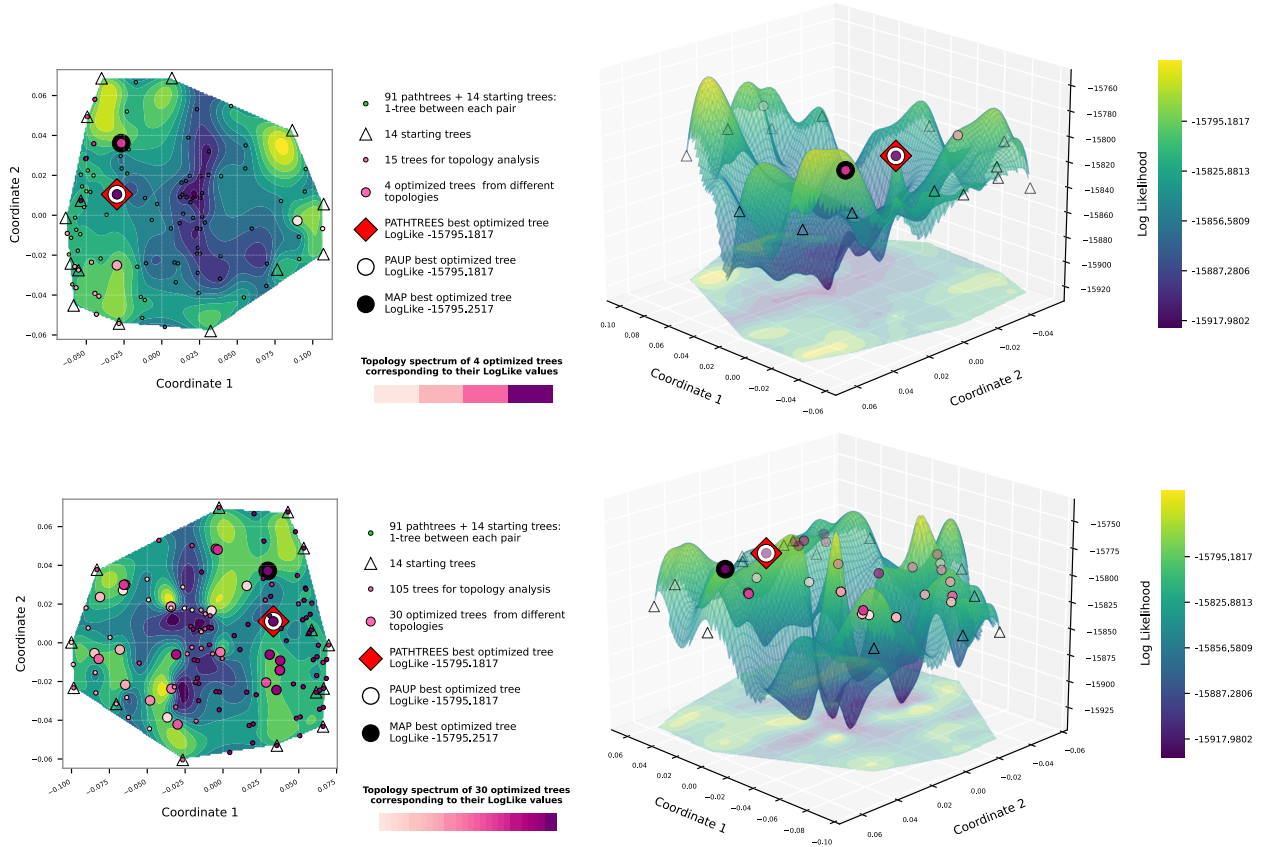

Figure 5. Contour and surface plots of PATHTREES for dataset  $D_1$  when generating one pathtree per starting tree pair (91 pathtrees), using BHV distances for the MDS input, and thin-plate spline interpolation for the landscape. The vertices of the convex hull of the selected 1000 sample trees are the starting trees (14 triangles). First row: 15 trees with the highest likelihood were selected from the 91 + 14 trees and classified based on their topologies (4 topologies with the relative likelihoods of their branch-length optimized trees given by the purple spectrum). Each medium-size circle with a purple color shows one of these locally optimal trees. The red square shows the best likelihood tree in the treespace found by PATHTREES. The large white disk shows the best tree of PAUP\*, which is identical to PATHTREES' optimal tree. One of PATHTREES' locally optimal trees matches the MAP tree (big black circle). Second row: all 91 + 14 trees were selected and classified based on their topologies (30 topologies). Medium-size disks on a purple spectrum show the 30 locally optimal trees and their relative likelihoods. The big red square shows the best likelihood tree of PATHTREES.

338 the path of the geodesics (curved lines of pathtrees) in some cases.

339 For the second dataset  $D_2$ , Fig. 7 shows the contour and surface plots of the likelihood landscape from  
 340 two iterations of PATHTREES, with the second iteration zooming in on the top 100 optimized trees from the  
 341 first iteration. The first row of Fig. 7 shows the first iteration plots, generated using 4 pathtrees per shortest  
 342 path between starting trees (14 starting trees) and selecting the 100 trees with the highest likelihood to  
 343 classify by topology. All selected trees have different topologies, giving 100 optimized trees. PATHTREES  
 344 found a similar tree to the best tree from PAUP\*, both with the log likelihood  $-5225.5856$ . The second row  
 345 of Fig. 7 shows the second iteration plots, zooming in on the convex hull of the 100 optimized trees from the  
 346 first iteration. 11 trees on the vertices of this convex hull became the starting trees for the second iteration.

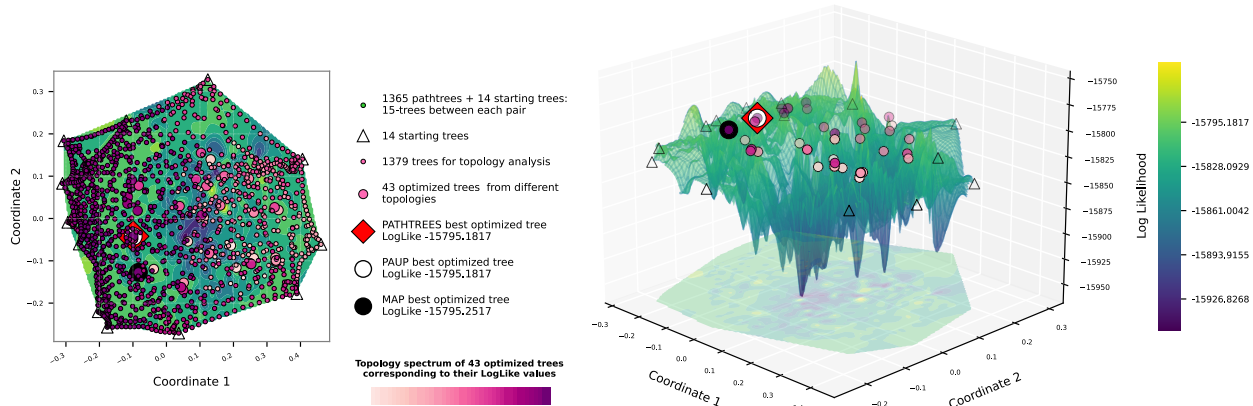

Figure 6. Contour and surface plots of PATHTREES for dataset  $D_1$  when generating 15 pathtree per starting tree pair, using weighted Robinson-Foulds distances for the MDS input, and thin-plate spline interpolation for the landscape. After optimizing branch lengths for the 43 different topologies (colored by relative likelihood of this optimized tree using the purple spectrum), PATHTREES found the best tree (red square) with the log likelihood  $-15795.1817$ , which is the same as the optimal tree of PAUP\* (white circle).

347 After generating 5 pathtrees between each starting tree pair and classifying the generated pathtrees based  
 348 on topology, we found 154 different topologies, which we optimized. Despite additional topologies, we found  
 349 the same tree with highest likelihood as in the first iteration. In the first row plots, we see only a small area  
 350 of high likelihood trees, separated into two peaks, near the center. In the second row plots, zoomed in on  
 351 this high likelihood section, we still see a lower likelihood chasm dividing the convex hull. The optimized  
 352 topology trees are near the edges of the convex hull.

353 A comparison of the three optimal trees, namely ours, the best PAUP\* tree, and the best RAXML tree,  
 354 revealed that all trees are different from each other. Table 1 shows the weighted and unweighted Robinson-  
 355 Foulds distances between the trees and their log likelihoods. Our tree and the PAUP\* tree are close and  
 356 only differ by four splits, whereas the RAXML tree differs from both our tree and the PAUP\* tree by nine  
 357 splits. The wRF distances between these three trees show similar relationships. The RAXML tree is different  
 358 because its topology was found by applying a JC69 model with site rate variation (RAXML always uses site  
 359 rate variation), but we then used PAUP\* to find the optimal branch lengths for that topology, and the plain  
 360 JC69 model to compute the likelihoods. The log likelihoods for all these 'best' trees are very similar, and  
 361 comparing their location on the surface in Fig. 7 also shows that the best PATHTREES and PAUP\* trees are  
 362 close, whereas the RAXML tree seems to be on a different local maximum on the surface. Supplementary  
 363 Fig. S3 contains all three trees showing their topology differences.

364 We used MDS to visualize the BHV treespace. This compression of the high dimensional space to 2  
 365 dimensions may lead to artifacts. We validated the accuracy of our visualizations using correlation anal-  
 366 yses between the distance matrix in BHV space and the MDS distance matrix using the first and second  
 367 coordinates. For the first dataset  $D_1$  (Fig. 5, bottom row) the Pearson correlation was 0.9237 (additional

Table 1. Comparison of the best tree found by PATHTREES, PAUP\*, and RAXML using the data  $D_2$ . Above the diagonal is unweighted Robinson-Foulds (uRF) for all pairs and below the diagonal is the weighted Robinson-Foulds distance (wRF). The last column is the log likelihood for each tree.

| Tree      | uRF / wRF |        |       | ln L       |
|-----------|-----------|--------|-------|------------|
|           | PATHTREES | PAUP*  | RAXML |            |
| PATHTREES | -         | 4      | 9     | -5225.5856 |
| PAUP*     | 0.0054    | -      | 9     | -5225.5856 |
| RAXML     | 0.0343    | 0.0325 | -     | -5225.8638 |

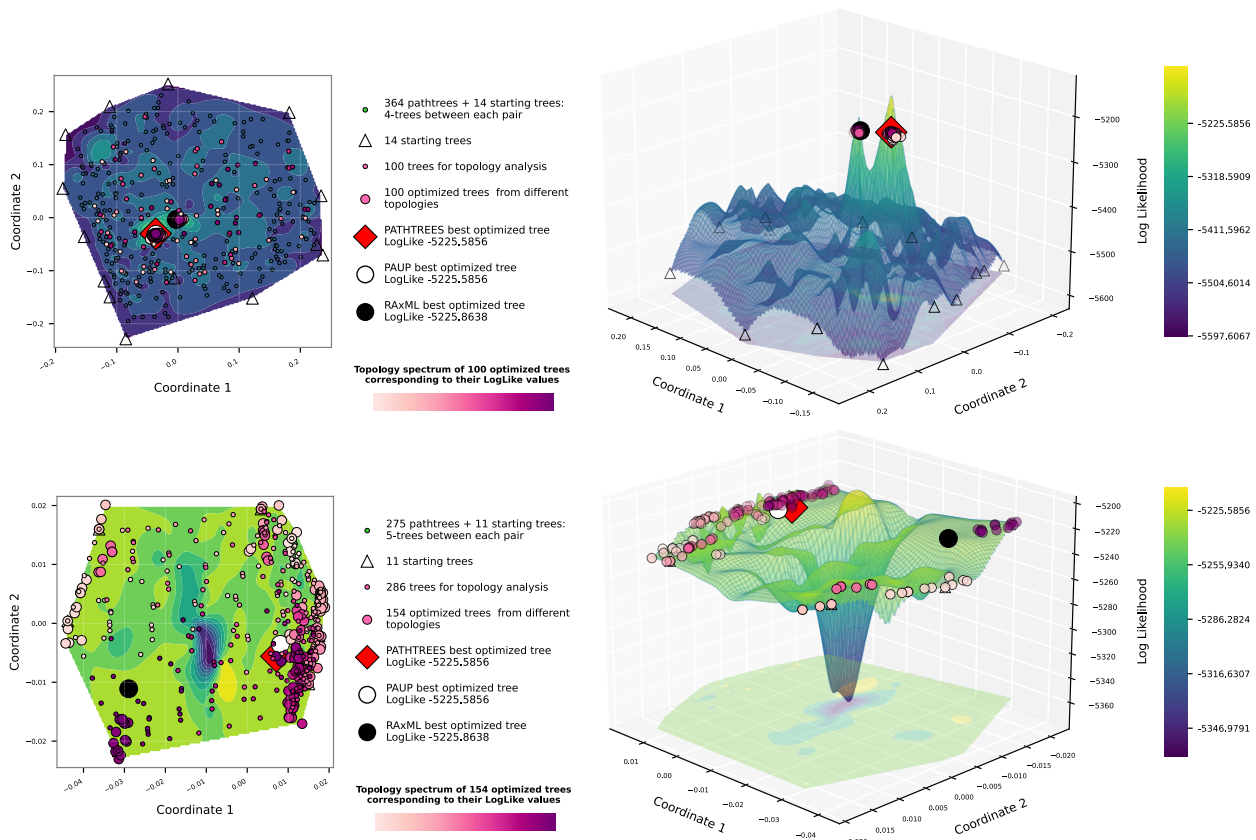

Figure 7. Contour and surface plots from PATHTREES for dataset  $D_2$ , using weighted Robinson-Foulds distances for the MDS input, and thin-plate spline interpolation for the landscape. First row: the vertices of the convex hull of the selected 500 sample trees are the starting trees (14 triangles). Four trees were generated on the geodesic of each pair of starting trees (364 pathtrees). Among them, 100 trees with the highest likelihood were selected to be classified based on topology. All 100 selected trees have different topologies (small circles, colored from the purple spectrum by the relative likelihood of their optimized tree). Each medium circle with a color from the purple spectrum shows the optimized tree with the corresponding topology. Among optimized trees, the red square shows the highest likelihood tree in the treespace, which is close but not identical to the best tree of PAUP\* (white circle). The RAXML tree (large black circle) is different. Second row: Displays the treespace after zooming in on the optimized trees. The vertices of the convex hull of 100 optimized trees from the first iteration are the starting trees (11 triangles). Five pathtrees were generated between each starting tree pair (275 trees) and then all of them were selected to be classified by topology.

368 correlation measures and the Shepard diagram are shown in [Supplementary Section S4.1](#)). For dataset  $D_2$

369 the Pearson correlation coefficient for [Fig. 7](#), top row (first iteration), was lower than for [Fig. 7](#), bottom



370 row (second iteration), 0.6856 and 0.9702 respectively, because the first figure covers a much larger area of  
371 trees than the second (more correlation measures and the Shepard diagrams are shown in [Supplementary](#)  
372 [Section S4.2](#)).

373 Our pathtrees are only based on the trees on the convex boundary, and one may wonder whether this  
374 reduces the chance to find relevant new trees. For dataset  $D_1$ , [Fig. 5](#) (bottom row), PATHTREES starting out  
375 with 14 starting trees and generating 91 pathtrees found a total of 28 different topologies among 91 pathtrees,  
376 4 of which were different from all topologies found by 50,000 sampled REVBAYES trees. A comparison with  
377 all 10,000 sampled REVBAYES trees for dataset  $D_2$  revealed that our method found all 364 pathtrees with  
378 new topologies in [Fig. 7](#) (first iteration), all of which were different from topologies found by REVBAYES. In  
379 [Fig. 7](#) (second iteration), PATHTREES found a total of 145 different topologies among 275 pathtrees, again all  
380 different from the total topologies found by 10,000 sampled REVBAYES trees.

### 381 **3 Discussion**

382 Our approach uses the Billera-Holmes-Vogtmann treespace framework to generate and visualize treespace,  
383 including the likelihood landscape, in an area of interest, and to augment the search for the maximum  
384 likelihood tree by investigating global and local maxima found by our method in this area. While there are  
385 other programs and packages for MDS visualizations of treespace under various distance metrics, PATHTREES  
386 is the only recent tool to include comprehensive visualization of phylogenetic likelihood landscapes over an  
387 area of interest. Our method can be used at different scales (e.g., see [Fig. 7](#)) to better understand the spatial  
388 relationship between the highest likelihood trees. For example, in [Fig. 7](#), the initial landscape shows the  
389 highest likelihood trees are close together within the MCMC searched area of treespace; zooming in allows us  
390 to see that these trees form two high likelihood ridges, with a lower-likelihood region between them. Secondly,  
391 our method can find trees with the same maximal likelihood as other tree search programs, including one  
392 with a different topology for dataset  $D_2$ . These results suggest PATHTREES could potentially be used to  
393 understand treespace islands and terraces better.

394 A limitation of our method is the need for starting trees, due to the enormity of treespace. For our two  
395 example datasets, treespace has  $5.6 \times 10^{26}$  orthants and  $4.7 \times 10^{384}$  orthants, respectively, so we cannot start  
396 with the full treespace and just zoom in. We decided to use a sample of trees from a Bayesian phylogenetic  
397 inference program, REVBAYES. In principle, any set of reasonably close trees to the best tree may work  
398 as a starting point. Using the convex hull in MDS space to start our approach helped reduce the geodesic  
399 distance matrix size used to create the visualizations. In a way, we treat the convex hull in MDS space as an  
400 approximation of the convex hull in treespace ([Lubiw et al. 2020](#); [Lin et al. 2017](#)). However, we believe that

401 the hull defined by MDS allows us to investigate good and best trees within its boundary. In our examples,  
402 the best tree, found by other procedures and ours, is within this MDS hull.

403 A second limitation of our method is that tree topologies along geodesics can only contain splits that are in  
404 one of the two endpoints trees and contain all splits that are in both of the endpoint trees. However, we argue  
405 this constraint is not onerous - there can still be exponentially many topologies fitting this description - but  
406 means that the intermediate tree topologies explored are relevant. Additionally, trees on a geodesic between  
407 two starting trees are unlikely to be in the set of best trees because this geodesic defines their branch lengths  
408 and topology. Thus, our method takes these pathtrees as starting points and optimizes their branch lengths  
409 (once per topology). This procedure allows us to describe the tree landscape along the path and describe  
410 the maxima for specific topologies. Using many pathtrees that were optimized or not optimized will give a  
411 precise picture of the tree landscape (for example, Fig. 5, Fig. 6, and Fig. 7). Our method provides a simple  
412 framework for exploring landscapes of phylogenetic trees and visualizing their relationship in a continuous  
413 and low-dimensional projection facilitated by multidimensional scaling and an interpolation method, cubic  
414 spline or thin-plate spline interpolation, to reveal potential tree islands. The visualization gives a good  
415 impression of the likelihood landscape: general patterns can be shown with few trees, but details may need  
416 many more trees to create a more smooth surface. However, even with many trees, the visualization may  
417 contain artifacts in areas where there are no trees, for example, the spikes in Fig. 7.

418 A Bayesian inference method evaluates trees according to the posterior probability, which is dominated  
419 by the likelihood of the tree when we assume vague prior distributions. It is fair to say that even a long  
420 inference run will not explore all possible topologies. Even our small dataset of 23 primate species has too  
421 many different topologies to explore all in a Bayesian context in a reasonable time. Of course, most of these  
422 topologies will have an inferior fit to the sequence data, but even those trees that fit the data relatively well  
423 are many. In contrast to Bayesian inference and heuristic search methods, our method does not depend on  
424 an optimality criterium to pick trees that lay on the shortest path between two arbitrarily chosen trees. This  
425 allows exploring topologies that were never visited with a good Bayesian run or any other heuristic search as  
426 we have shown.

427 We picked the two datasets because they represent very different situations. The primate dataset  $D_1$  is  
428 relatively small. However, it is still too big to be solved exhaustively. It provides many mutational differences  
429 allowing good resolution of branch lengths and branching patterns. The second dataset  $D_2$  has eight times  
430 more individuals that are closely related. Many sequences are identical, leading to many multifurcations.

431 Heuristic searches for  $D_1$  and  $D_2$  are fast, and even an MCMC run with REVBAYES does not need a  
432 long time for  $D_1$ . However, we had difficulties estimating a MAP tree for  $D_2$  because we had difficulty  
433 running to convergence. PATHTREES generates independent trees, evenly spaced along geodesics, to help

434 visualize treespace, find optimal trees, and explore the likelihood surface near these optimal trees. PATHTREES  
435 optimizes its pathtrees and finds local maxima for the evaluated topologies; these are the same as those found  
436 by PAUP\* and REVBAYES for  $D_1$ . Interestingly, the MAP tree and the PAUP\* tree differ by two splits but  
437 when the branch lengths are optimized deliver log likelihoods that are very similar. Even ten times longer  
438 runs in REVBAYES deliver the same MAP tree. So while it may seem difficult for REVBAYES to explore that  
439 particular topology with the highest likelihood, the difference is only 0.07 log units. We certainly would not  
440 exclude the MAP tree in a likelihood ratio test. The second dataset  $D_2$  reveals that many trees will be good  
441 candidates for the best likelihood tree. The PAUP\*, RAXML, and PATHTREES best trees have all different  
442 topologies but very similar log likelihoods. These trees are also very similar, with only 4 or 9 different splits  
443 between them. PATHTREES helps give insights about the likelihood surface, such that it is rather flat and  
444 therefore will have many potential trees with similar likelihoods.

445 We believe that our method, implemented in PATHTREES, complements heuristic search phylogenetic  
446 analyses and allows visualization of the treespace and finding alternative trees with log likelihoods that are  
447 potentially better than those of heuristic searchers. For example, a new way to propose topologies for tree  
448 search could be by sampling pathtrees along a geodesic between two trees, or in a region, of interest. Alterna-  
449 tively, pathtrees could become starting trees themselves for a maximum likelihood search. The visualization  
450 of the likelihood surface also allows the discussion of local likelihood maxima, which we hope will lay the  
451 groundwork for improving search algorithms.

## 452 **Supplementary Material**

453 Supplementary data are available in a single separate PDF file.

## 454 **Acknowledgements**

455 PB was partially supported by the US National Science Foundation grant DBI 1564822 and DBI 2019989.  
456 MO was partially supported by the US National Science Foundation grant DMS 1847271.

## 457 **Software Availability**

458 We implemented our method as free software named PATHTREES under the MIT open-source licence. The  
459 source code and the documentation of PATHTREES are available at [https://github.com/TaraKhodaei/  
460 pathtrees\\_project.git](https://github.com/TaraKhodaei/pathtrees_project.git)

461 The primate data is available from the Tutorial website of REVBAYES: [https://revbayes.github.io/](https://revbayes.github.io/tutorials/ctmc/#example-character-evolution-under-the-jukes-cantor-substitution-model)  
462 [tutorials/ctmc/#example-character-evolution-under-the-jukes-cantor-substitution-model](https://revbayes.github.io/tutorials/ctmc/#example-character-evolution-under-the-jukes-cantor-substitution-model) (the  
463 dataset url is [https://revbayes.github.io/tutorials/ctmc/data/primates\\_and\\_galeopterus\\_cytb.nex](https://revbayes.github.io/tutorials/ctmc/data/primates_and_galeopterus_cytb.nex)).  
464 The snake dataset is available from the Dryad Digital Repository: [http://dx.doi.org/10.5061/dryad.](http://dx.doi.org/10.5061/dryad.7hs34mj)  
465 [7hs34mj](http://dx.doi.org/10.5061/dryad.7hs34mj).

## 466 References

- 467 N. Amenta and J. Klingner. Case study: Visualizing sets of evolutionary trees. In *IEEE Symposium on*  
468 *Information Visualization, 2002. INFOVIS 2002.*, pages 71–74. IEEE, 2002.
- 469 N. Amenta, M. Godwin, N. Postarnakevich, and K. St. John. Approximating geodesic tree distance. *Inform*  
470 *Process Lett*, 103(2):61–65, 2007.
- 471 N. Amenta, M. Datar, A. Dirksen, M. d. Bruijne, A. Feragen, X. Ge, J. H. Pedersen, M. Howard, M. Owen,  
472 J. Petersen, et al. Quantification and visualization of variation in anatomical trees. In *Research in Shape*  
473 *Modeling*, pages 57–79. Springer, 2015.
- 474 O. Bastert, D. Rockmore, P. F. Stadler, and G. Tinhofer. Landscapes on spaces of trees. *Appl Math Comput*,  
475 131(2-3):439–459, 2002.
- 476 L. J. Billera, S. P. Holmes, and K. Vogtmann. Geometry of the space of phylogenetic trees. *Adv Appl Math*,  
477 27(4):733–767, 2001.
- 478 R. R. Bouckaert. DensiTree: making sense of sets of phylogenetic trees. *Bioinformatics.*, 26(10):1372–1373,  
479 2010.
- 480 M. D. Buhmann. Chapter 2 - summary of methods and applications. In *Radial Basis Functions: Theory and*  
481 *Implementations*, volume 12. Cambridge University Press, 2003.
- 482 P. Buneman. The recovery of trees from measures of dissimilarity. In *Mathematics in the Archeological and*  
483 *Historical Sciences*, pages 387–395. Edinburgh University Press, 1971.
- 484 E. A. Chambers and D. M. Hillis. The multispecies coalescent over-splits species in the case of geographically  
485 widespread taxa. *Syst Biol*, 69(1):184–193, 2019.
- 486 B. Chor and T. Tuller. Maximum likelihood of evolutionary trees is hard. In *Annual International Conference*  
487 *on Research in Computational Molecular Biology*, pages 296–310. Springer, 2005.

488 B. Chor, M. D. Hendy, B. R. Holland, and D. Penny. Multiple maxima of likelihood in phylogenetic trees:  
489 an analytic approach. *Mol Biol Evol*, 17(10):1529–1541, 2000.

490 M. A. A. Cox and T. F. Cox. Multidimensional scaling. In *Handbook of Data Visualization*, pages 315–347.  
491 Springer, Heidelberg, Berlin, 2008.

492 C. De Boor. Piecewise cubic interpolation. In *A Practical Guide to Splines*, pages 40–47. Springer-Verlag,  
493 New York, 1978.

494 A. J. Drummond and A. Rambaut. BEAST: Bayesian evolutionary analysis by sampling trees. *BMC Evol*  
495 *Biol*, 7(1):214, 2007.

496 J. Felsenstein. Evolutionary trees from DNA sequences: A maximum likelihood approach. *J Mol Evol*, 17  
497 (6):368–376, 1981.

498 W. M. Fitch. Toward defining the course of evolution: minimum change for a specified tree topology. *Syst*  
499 *Zool*, 20(4):406–416, 1971.

500 W. M. Fitch and E. Margoliash. Construction of phylogenetic trees. *Science*, 155(3760):279–284, 1967.

501 L. R. Foulds and R. L. Graham. The Steiner problem in phylogeny is NP-complete. *Adv Appl Math*, 3(1):  
502 43–49, 1982.

503 K. Gori, T. Suchan, N. Alvarez, N. Goldman, and C. Dessimoz. Clustering genes of common evolutionary  
504 history. *Mol Biol Evol*, 33(6):1590–1605, 2016.

505 S. Guindon and O. Gascuel. A simple, fast, and accurate algorithm to estimate large phylogenies by maximum  
506 likelihood. *Syst Biol*, 52(5):696–704, 2003.

507 C. R. Harris, K. J. Millman, S. J. van der Walt, R. Gommers, P. Virtanen, D. Cournapeau, E. Wieser,  
508 J. Taylor, S. Berg, N. J. Smith, R. Kern, M. Picus, S. Hoyer, M. H. van Kerkwijk, M. Brett, A. Haldane,  
509 J. Fernández del Río, M. Wiebe, P. Peterson, P. Gérard-Marchant, K. Sheppard, T. Reddy, W. Weckesser,  
510 H. Abbasi, C. Gohlke, and T. E. Oliphant. Array programming with NumPy. *Nature*, 585(7825):357–362,  
511 2020.

512 D. M. Hillis, T. A. Heath, and K. St. John. Analysis and visualization of tree space. *Syst Biol*, 54(3):471–482,  
513 2005.

514 S. Höhna and A. J. Drummond. Guided tree topology proposals for Bayesian phylogenetic inference. *Syst*  
515 *Biol*, 61(1):1–11, 2012.

516 S. Höhna, M. J. Landis, T. A. Heath, B. Boussau, N. Lartillot, B. R. Moore, J. P. Huelsenbeck, and  
517 F. Ronquist. RevBayes: Bayesian phylogenetic inference using graphical models and an interactive model-  
518 specification language. *Syst Biol*, 65(4):726–736, 2016.

519 S. Höhna, M. J. Landis, and T. A. Heath. Phylogenetic inference using RevBayes. *Curr Protocols Bioinform-*  
520 *atics*, 57(1):6.16.1–6.16.34, 2017.

521 W. Huang, G. Zhou, M. Marchand, J. R. Ash, D. Morris, P. Van Dooren, J. M. Brown, K. A. Gallivan, and  
522 J. C. Wilgenbusch. Treescaper: visualizing and extracting phylogenetic signal from sets of trees. *Mol Biol*  
523 *Evol*, 33(12):3314–3316, 2016.

524 J. P. Huelsenbeck and F. Ronquist. MRBAYES: Bayesian inference of phylogenetic trees. *Bioinformatics*, 17  
525 (8):754–755, 2001.

526 T. Jombart, M. Kendall, A. Almagro, J. Garcia, and C. Colijn. TREESPACE: Statistical exploration of  
527 landscapes of phylogenetic trees. *Mol Ecol Resour*, 17(6):1385–1392, 2017.

528 M. Kendall and C. Colijn. Mapping phylogenetic trees to reveal distinct patterns of evolution. *Mol Biol Evol*,  
529 33(10):2735–2743, 2016.

530 J. B. Kruskal. Multidimensional scaling by optimizing goodness of fit to a nonmetric hypothesis. *Psychome-*  
531 *trika*, 29(1):1–27, 1964.

532 C. Lakner, P. van der Mark, J. P. Huelsenbeck, B. Larget, and F. Ronquist. Efficiency of Markov chain  
533 Monte Carlo tree proposals in Bayesian phylogenetics. *Syst Biol*, 57(1):86–103, 2008.

534 B. Lin, B. Sturmfels, X. Tang, and R. Yoshida. Convexity in tree spaces. *SIAM J Discrete Math*, 31(3):  
535 2015–2038, 2017.

536 Z. Liu, S. H. Zhan, and T. Munzner. Aggregated dendrograms for visual comparison between many phylo-  
537 genetic trees. *IEEE Trans Vis Comput Graph*, 26(9):2732–2747, 2019.

538 A. Lubiw, D. Maftuleac, and M. Owen. Shortest paths and convex hulls in 2D complexes with non-positive  
539 curvature. *Comput Geom*, 89:101626, 2020.

540 D. R. Maddison. The discovery and importance of multiple islands of most-parsimonious trees. *Syst Biol*, 40  
541 (3):315–328, 1991.

542 E. Miller, M. Owen, and J. S. Provan. Polyhedral computational geometry for averaging metric phylogenetic  
543 trees. *Adv Appl Math*, 68:51–91, 2015.

- 544 D. Money and S. Whelan. Characterizing the phylogenetic tree-search problem. *Syst Biol*, 61(2):228, 2012.
- 545 M. Owen and J. S. Provan. A fast algorithm for computing geodesic distances in tree space. *IEEE/ACM*  
546 *Trans Comput Biol Bioinf*, 8(1):2–13, 2011.
- 547 D. F. Robinson and L. R. Foulds. Comparison of weighted labelled trees. *Lect Notes Math*, 748:119–126,  
548 1979.
- 549 D. F. Robinson and L. R. Foulds. Comparison of phylogenetic trees. *Math Biosci*, 7(1):1–8, 1981.
- 550 S. Roch. A short proof that phylogenetic tree reconstruction by maximum likelihood is hard. *IEEE/ACM*  
551 *Trans Comput Biol Bioinf*, 3(1):92–94, 2006.
- 552 S. Ruane, R. W. J. Bryson, R. A. Pyron, and F. T. Burbrink. Coalescent species delimitation in milksnakes  
553 (Genus *Lampropeltis*) and impacts on phylogenetic comparative analyses. *Syst Biol*, 63(2):231–250, 2014.
- 554 N. Saitou and M. Nei. The Neighbor-joining method: a new method for reconstructing phylogenetic trees.  
555 *Mol Biol Evol*, 4(4):406–425, 1987.
- 556 L. A. Salter. Complexity of the likelihood surface for a large DNA dataset. *Syst Biol*, 50(6):970–978, 2001.
- 557 M. J. Sanderson, M. M. McMahon, and M. Steel. Terraces in phylogenetic tree space. *Science*, 333(6041):  
558 448–450, 2011.
- 559 M. J. Sanderson, M. M. McMahon, A. Stamatakis, D. J. Zwickl, and M. Steel. Impacts of terraces on  
560 phylogenetic inference. *Syst Biol*, 64(5):709–726, 2015.
- 561 E. Schröder. Vier combinatorische Probleme. *Z Math Phys*, 15:361–376, 1870.
- 562 M. R. Smith. Robust analysis of phylogenetic tree space. *Syst Biol*, 71(5):1255–1270, 2022.
- 563 K. St. John. The shape of phylogenetic treespace. *Syst Biol*, 66(1):e83–e94, 2017.
- 564 A. Stamatakis, T. Ludwig, and H. Meier. RAxML-III: a fast program for maximum likelihood-based inference  
565 of large phylogenetic trees. *Bioinformatics*, 21(4):456–463, 2005.
- 566 M. Steel. The maximum likelihood point for a phylogenetic tree is not unique. *Syst Biol*, 43(4):560–564,  
567 1994.
- 568 M. A. Steel and D. Penny. Distributions of tree comparison metrics—some new results. *Syst Biol*, 42(2):  
569 126–141, 1993.

- 570 J. Sukumaran and M. T. Holder. DendroPy: a Python library for phylogenetic computing. *Bioinformatics*,  
571 26(12):1569–1571, 2010.
- 572 D. Swofford. PAUP\*. phylogenetic analysis using parsimony (\*and other methods). version 4., 2003.
- 573 P. Virtanen, R. Gommers, T. E. Oliphant, M. Haberland, T. Reddy, D. Cournapeau, E. Burovski, P. Peterson,  
574 W. Weckesser, J. Bright, S. J. van der Walt, M. Brett, J. Wilson, K. J. Millman, N. Mayorov, A. R. J.  
575 Nelson, E. Jones, R. Kern, E. Larson, C. J. Carey, Í. Polat, Y. Feng, E. W. Moore, J. VanderPlas,  
576 D. Laxalde, J. Perktold, R. Cimrman, I. Henriksen, E. A. Quintero, C. R. Harris, A. M. Archibald, A. H.  
577 Ribeiro, F. Pedregosa, P. van Mulbregt, and SciPy 1.0 Contributors. SciPy 1.0: fundamental algorithms  
578 for scientific computing in Python. *Nat Methods*, 17:261–272, 2020.
- 579 D. L. Warren, A. J. Geneva, and R. Lanfear. RWTY (R We There Yet): an R package for examining  
580 convergence of Bayesian phylogenetic analyses. *Mol Biol Evol*, 34(4):1016–1020, 2017.
- 581 C. Whidden and F. A. Masten. Quantifying MCMC exploration of phylogenetic tree space. *Syst Biol*, 64(3):  
582 472–491, 2015.
- 583 J. C. Wilgenbusch, W. Huang, and K. A. Gallivan. Visualizing phylogenetic tree landscapes. *BMC bioinforma-*  
584 *tics*, 18:85, 2017.
- 585 A. M. Wright and G. T. Lloyd. Bayesian analyses in phylogenetic palaeontology: interpreting the posterior  
586 sample. *Palaeontology*, 63(6):997–1006, 2020.
